# Supplementary material for: Effect of Insecticides Imidacloprid and Alpha-Cypermethrin on the Development of Pea (Pisum sativum L.) Nodules
Source: MDPI journal article supplement (doi:10.3390/plants13233439), 2024-12-07
Supplement: s1 [file s1]

## Effect of Insecticides Imidacloprid and Alpha-Cypermethrin on the Development of Pea (*Pisum sativum* L.) Nodules

Artemii P. Gorshkov<sup>1,&</sup>, Pyotr G. Kusakin<sup>1,&</sup>, Maxim G. Vorobiev<sup>2</sup>, Anna V. Tsyganova<sup>1\*</sup> and Viktor E. Tsyganov<sup>1</sup>

<sup>1</sup> All-Russia Research Institute for Agricultural Microbiology, Laboratory of Molecular and Cell Biology, Saint Petersburg, Russia; a.gorshkov@arriam.ru (A.P.G.); pyotr.kusakin@arriam.ru (P.G.K.); vetsyganov@arriam.ru (V.E.T)

<sup>2</sup> Research Resource Centre "Molecular and Cell Technologies", Saint Petersburg State University, 199034 Saint Petersburg, Russia; vorobiev.maxim@spbu.ru (M.G.V.)

<sup>&</sup> These authors contributed equally to this work

\*Author for correspondence:

Anna V. Tsyganova

Tel: +7 812 4705100

E-mail: avtsyganova@arriam.ru

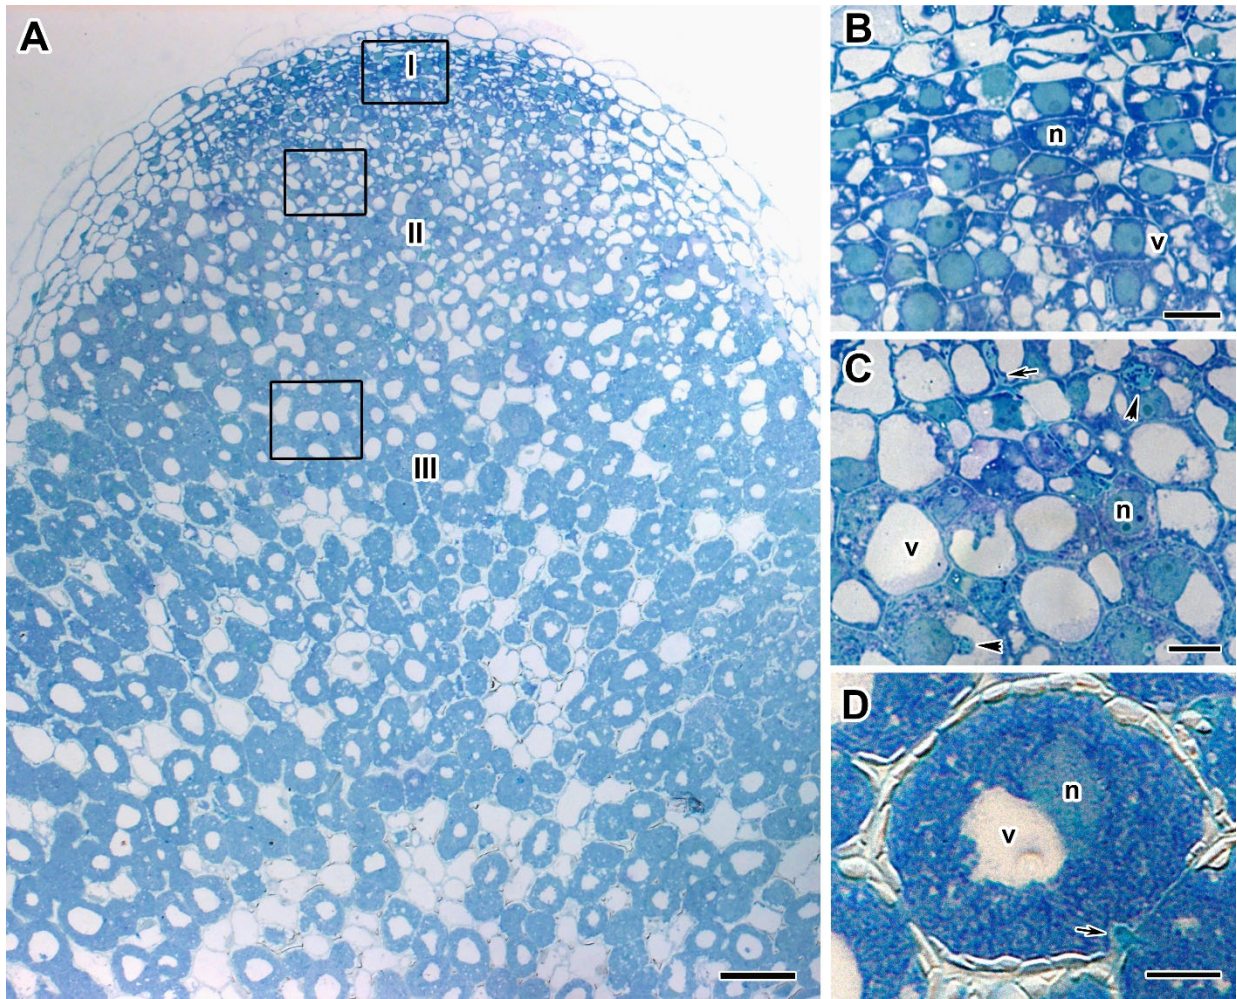

**Supplementary Figure 1.** Histological organization of the nodules of 20-day-old untreated plants of pea (*Pisum sativum* L.) cv. 'Frisson'. (A) Longitudinal section of a nodule. (B–D) High magnification of the boxed area in (A). (B) Nodule meristematic cells. (C) Cells in the infection zone. (D) Infected cells in the nitrogen fixation zone. I, meristem; II, infection zone; III, nitrogen fixation zone; n, nucleus; v, vacuole. Arrows indicate infection threads, arrowheads indicate infection droplets. Bars (A) = 100  $\mu$ m, (B–D) = 10  $\mu$ m.

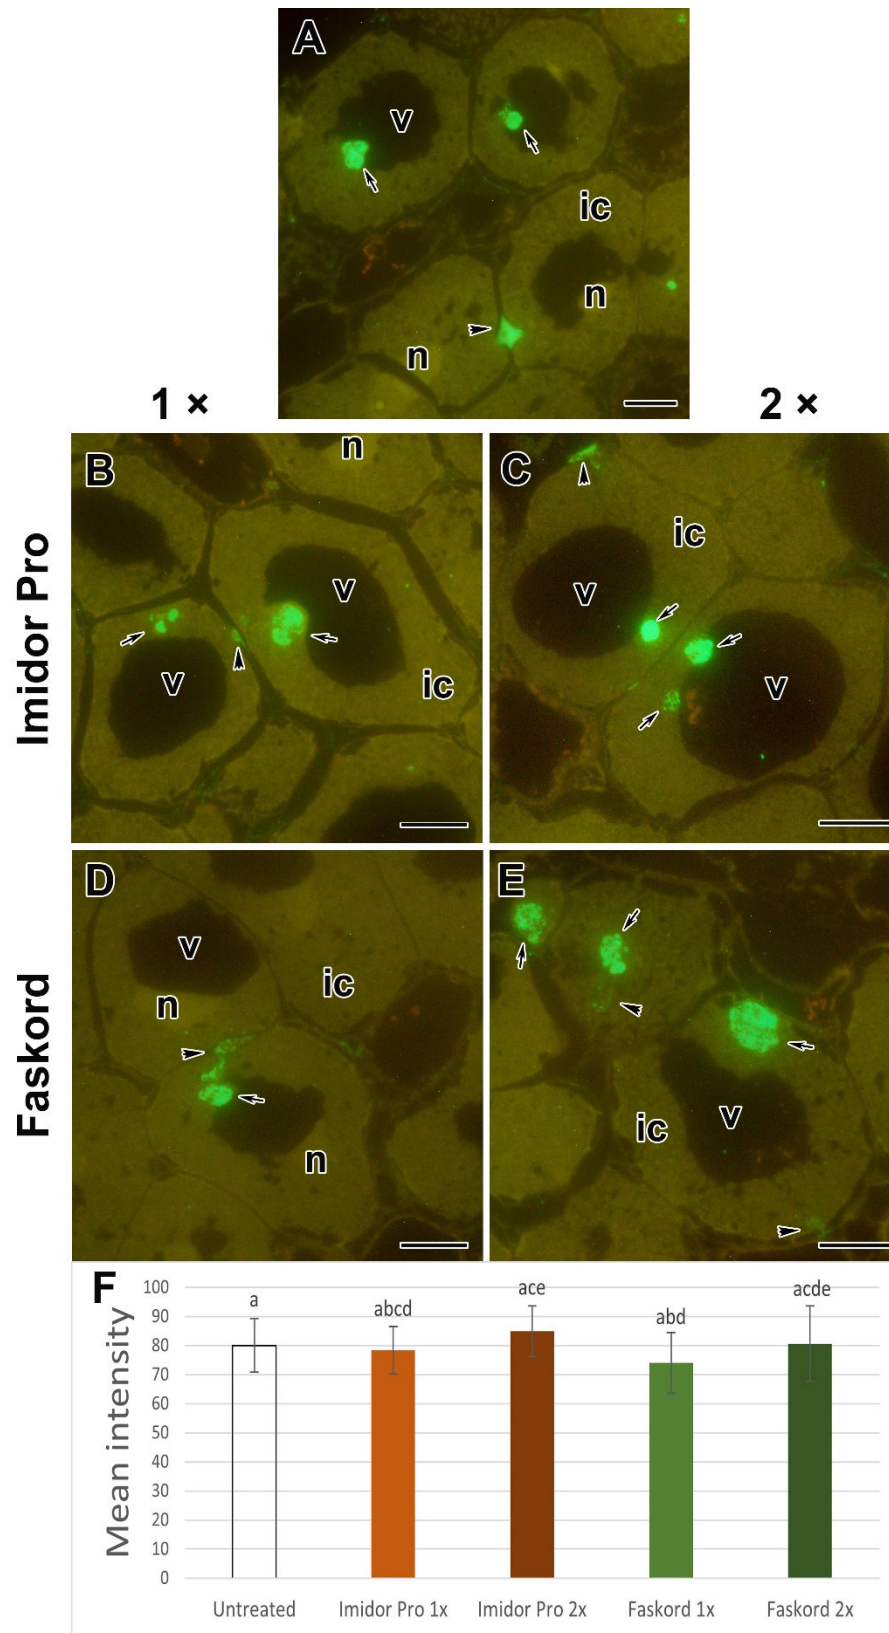

**Supplementary Figure 2.** Effect of insecticide treatment of pea (*Pisum sativum* L.) cv. 'Frisson' on the matrix composition of infection droplets in nodule cells. (A–E) Immunolocalization of intercellular plant glycoprotein labeled with MAC265 MAb. (A) Section of nodules of untreated plant. Treatment with Imidor Pro (B,C) and Faskord (D,E) with concentration recommended by the manufacturer (B,D) and with a twofold-concentrated solution of insecticides (C,E). (F) Mean fluorescence intensity. The secondary antibodies used were goat anti-rat (A–E) IgG MAb conjugated with Alexa Fluor 488. ic, infected cell; n, nucleus; v, vacuole. Arrows indicate infection droplets. Different letters indicate groups with a significant difference according to Tukey's HSD test ( $p$ -value < 0.05;  $n$  = 30–45). Vertical bars represent standard deviation. Bars = 10  $\mu$ m.

**Supplementary Table 1.** List of differentially expressed genes in 20-day-old nodules of pea (*Pisum sativum* L.) plants cv. 'Frisson' treated with Imidor Pro insecticide in the concentration recommended by the manufacturer.

| Gene ID         | log2 fold change | Annotation                                            |
|-----------------|------------------|-------------------------------------------------------|
| Psat2g009480    | 6.517476746      | Pentatricopeptide repeat                              |
| Psat3g090720    | 3.66947919       | Phosphatidylethanolamine-binding protein              |
| Psat1g014320    | 3.334807949      | Transglycosylase SLT domain                           |
| Psat7g168680    | 3.090087872      | Leucine rich repeat                                   |
| Psat5g092480    | 2.953520429      | Major Facilitator Superfamily                         |
| Psat2g101000    | 2.889256342      | Heavy metal transport/detoxification protein          |
| Psat5g016280    | 2.624866624      | Cytochrome P450                                       |
| Psat2g026280    | 2.563901004      | Xylanase inhibitor N-terminal                         |
| Psat1g194520    | 2.419249572      | Fasciclin domain                                      |
| Psat6g013480    | 2.358409332      | EF-hand calcium-binding domain profile.               |
| Psat1g068040    | 2.259714437      | UDP-glucuronosyl and UDP-glucosyl transferase         |
| Psat2g133560    | 2.245046656      | SAM dependent carboxyl methyltransferase              |
| Psat7g122840    | 2.218827316      | Plastocyanin-like domain                              |
| Psat6g069040    | 2.131841851      | C2H2-type zinc finger                                 |
| Psat7g247800    | 2.089274401      | Multicopper oxidase                                   |
| Psat3g204320    | 2.08814167       | COBRA-like protein                                    |
| Psat7g068160    | 2.073451602      | Fasciclin domain                                      |
| Psat7g224400    | 2.053595092      | Fasciclin domain                                      |
| Psat4g015520    | 2.040841564      | Cytokinin dehydrogenase 1 + FAD and cytokinin binding |
| Psat0s2363g0160 | 1.982008256      | Mechanosensitive ion channel                          |
| Psat2g144000    | 1.974032731      | Transferase family                                    |
| Psat1g050520    | 1.957079734      | Cation transport protein                              |
| Psat1g195520    | 1.939432991      | EamA-like transporter family                          |
| Psat7g068120    | 1.894416828      | Intrinsic to membrane                                 |
| Psat0s1086g0040 | 1.865485021      | Protein of unknown function + DUF547                  |
| Psat6g021360    | 1.833076065      | Cytochrome P450                                       |
| Psat0s3979g0120 | 1.811252565      | Late embryogenesis abundant protein                   |
| Psat3g124040    | 1.793509408      | Dirigent-like protein                                 |
| Psat5g277720    | 1.770657325      | Fasciclin domain                                      |
| Psat2g114040    | 1.766342847      | Cupin                                                 |
| Psat1g128520    | 1.759610412      | COBRA-like protein                                    |
| Psat0s2012g0040 | 1.754841636      | DOMON domain                                          |
| Psat2g074320    | 1.674060319      | Cellulase (glycosyl hydrolase family 5)               |
| Psat6g061600    | 1.628012371      | Cellulose synthase                                    |
| Psat4g125440    | 1.589225235      | Cellulose synthase                                    |
| Psat5g299160    | 1.560435457      | Sulfate permease family                               |
| Psat1g047000    | 1.550779222      | ABC transporter transmembrane region                  |
| Psat5g019840    | 1.537132361      | Transmembrane amino acid transporter protein          |
| Psat0s2127g0040 | 1.507836669      | Unknown gene                                          |
| Psat5g249800    | 1.499711977      | Glycosyl transferase family 8                         |
| Psat2g127960    | 1.474155676      | Cellular response to abscisic acid stimulus           |
| Psat1g149960    | 1.45802971       | Cellulose synthase                                    |
| Psat7g006400    | 1.431647172      | Cellulose synthase                                    |



|                 |             |                                                                  |
|-----------------|-------------|------------------------------------------------------------------|
| Psat6g230840    | 1.418182589 | Family of unknown function (DUF716)                              |
| Psat5g003080    | 1.415381299 | Cyclophilin type peptidyl-prolyl cis-trans isomerase/CLD         |
| Psat1g174280    | 1.388974569 | Microtubule-associated protein 70                                |
| Psat1g121240    | 1.382296161 | Cotton fibre expressed protein                                   |
| Psat2g141040    | 1.368659598 | UDP-glucuronosyl and UDP-glucosyl transferase                    |
| Psat7g091280    | 1.345144343 | Unknown gene                                                     |
| Psat4g037680    | 1.340541293 | Nucleoside transporter                                           |
| Psat1g041680    | 1.316005999 | Unknown gene                                                     |
| Psat1g152520    | 1.313398593 | Non-haem dioxygenase in morphine synthesis N-terminal            |
| Psat4g024560    | 1.29517741  | transferase activity + transferring phosphorus-containing groups |
| Psat1g216120    | 1.275797909 | Caspase domain                                                   |
| Psat1g159520    | 1.243043113 | Unknown gene                                                     |
| Psat7g123800    | 1.217410813 | Phloem protein 2                                                 |
| Psat2g154000    | 1.213997566 | Thaumatococcus family                                            |
| Psat5g277760    | 1.194967799 | Fasciclin domain                                                 |
| Psat7g027320    | 1.173888394 | Unknown gene                                                     |
| Psat7g068960    | 1.171816721 | Cellulose synthase                                               |
| Psat5g091000    | 1.171321811 | Unknown gene                                                     |
| Psat7g137440    | 1.118773636 | Phloem protein 2                                                 |
| Psat6g192400    | 1.11498624  | ABA/WDS induced protein                                          |
| Psat2g023080    | 1.104200897 | Unknown gene                                                     |
| Psat4g024360    | 1.101616062 | Unknown gene                                                     |
| Psat6g021600    | 1.094327524 | Unknown gene                                                     |
| Psat2g057640    | 1.077318038 | Jacalin-like lectin domain                                       |
| Psat7g027360    | 1.076894579 | Unknown gene                                                     |
| Psat1g160280    | 1.071976539 | Unknown gene                                                     |
| Psat5g091040    | 1.0678506   | Unknown gene                                                     |
| Psat1g126560    | 1.061328046 | MADS domain signature                                            |
| Psat5g085520    | 1.042862486 | Transmembrane amino acid transporter protein                     |
| Psat5g250680    | 1.040708016 | Protein of unknown function (DUF1685)                            |
| Psat1g216240    | 1.039070709 | Caspase domain                                                   |
| Psat5g020720    | 1.03212403  | Transmembrane amino acid transporter protein                     |
| Psat6g012520    | 0.996879535 | Response to temperature stimulus                                 |
| Psat0s302g0200  | 0.992840824 | Myb-like DNA-binding domain                                      |
| Psat4g024520    | 0.968617383 | transferase activity + transferring phosphorus-containing groups |
| Psat2g131520    | 0.966828825 | Domain of unknown function (DUF2828)                             |
| Psat0s5147g0040 | 0.966565539 | N-terminal C2 in EEIG1 and EHBP1 proteins                        |
| Psat5g091920    | 0.965459754 | Unknown gene                                                     |
| Psat5g157360    | 0.955000133 | Protein tyrosine kinase                                          |
| Psat7g163680    | 0.910260452 | Lipase (class 3)                                                 |
| Psat7g130840    | 0.878564446 | Phloem protein 2                                                 |
| Psat7g130600    | 0.873355579 | Phloem protein 2                                                 |
| Psat2g131480    | 0.767945636 | Domain of unknown function (DUF2828)                             |
| Psat5g105200    | 0.761626894 | O-methyltransferase                                              |
| Psat1g004760    | 0.759476341 | Polysaccharide biosynthesis                                      |
| Psat7g014920    | 0.748149502 | Myc-type + basic helix-loop-helix (bHLH) domain profile.         |

|                 |              |                                                          |
|-----------------|--------------|----------------------------------------------------------|
| Psat3g033760    | 0.702492709  | Phosphatidylethanolamine-binding protein                 |
| Psat7g097360    | 0.693610655  | EamA-like transporter family                             |
| Psat2g142680    | 0.687569726  | Alternative oxidase                                      |
| Psat7g204640    | 0.66383094   | Fantastic Four meristem regulator                        |
| Psat1g041960    | 0.613166982  | Myc-type + basic helix-loop-helix (bHLH) domain profile. |
| Psat5g125160    | 0.601938416  | Protein of unknown function (DUF3633)                    |
| Psat7g145280    | 0.553598336  | Protein kinase domain                                    |
| Psat4g225160    | 0.527915128  | Membrane transport protein                               |
| Psat1g078480    | 0.448654267  | Cytochrome P450                                          |
| Psat7g048520    | -3.628169905 | Ring finger domain                                       |
| Psat4g225000    | -2.946880632 | AP2 domain                                               |
| Psat1g194920    | -2.293939688 | Tify domain                                              |
| Psat0s4837g0040 | -2.264948322 | Unknown gene                                             |
| Psat7g212000    | -2.081537343 | Unknown gene                                             |
| Psat3g023040    | -1.469289168 | Aromatic amino acid lyase                                |
| Psat3g056880    | -2.034896427 | Myb-like DNA-binding domain                              |
| Psat7g114080    | -1.994999499 | PDDEXK-like family of unknown function                   |
| Psat3g011600    | -1.943893436 | WIF domain profile.                                      |
| Psat3g023120    | -1.482479145 | Aromatic amino acid lyase                                |
| Psat3g162200    | -1.878168088 | Unknown gene                                             |
| Psat5g118840    | -1.87438766  | Unknown gene                                             |
| Psat5g119040    | -1.853952839 | Unknown gene                                             |
| Psat5g232880    | -1.806792229 | Unknown gene                                             |
| Psat1g046920    | -1.574664053 | Aromatic amino acid lyase                                |
| Psat0s9163g0040 | -1.796070476 | Unknown gene                                             |
| Psat5g022440    | -1.771675772 | Transferase family                                       |
| Psat0s1627g0040 | -1.707646227 | Myb-like DNA-binding domain                              |
| Psat3g180120    | -1.67800411  | Unknown gene                                             |
| Psat5g089720    | -1.677929215 | C2 domain                                                |
| Psat0s3829g0080 | -1.594811723 | Domain of unknown function (DUF4228)                     |
| Psat6g055240    | -1.797611016 | AP2 domain                                               |
| Psat1g131280    | -1.889932491 | Glycosyl hydrolases family 18                            |
| Psat5g133080    | -2.075946023 | EamA-like transporter family                             |
| Psat4g086600    | -1.416575573 | Protein kinase domain                                    |
| Psat4g094680    | -1.320480667 | Plasma membrane                                          |
| Psat5g089800    | -1.313102274 | C2 domain                                                |
| Psat0s1849g0080 | -1.308204495 | CCT motif                                                |
| Psat0s766g0040  | -1.228532156 | Tify domain                                              |
| Psat7g227560    | -1.04778838  | Sugar (and other) transporter                            |
| Psat5g200320    | -0.929383176 | Response regulator receiver domain                       |
| Psat6g081800    | -0.890075133 | GDSSL-like Lipase/Acylhydrolase                          |
| Psat6g120040    | -0.612628167 | CobN/Magnesium Chelatase                                 |
| Psat1g122080    | -0.560281141 | Trypsin and protease inhibitor                           |
| Psat3g194360    | -0.450432998 | Transmembrane amino acid transporter protein             |
